# Supplementary material for: A Framework for Quantifying the Strength of Partnerships between Agricultural Cooperatives and Development Actors: A Case Study in Saudi Arabia
Source: MDPI journal article supplement (doi:10.3390/ijerph20010364), 2022-12-26
Supplement: s1 [file s1]

**Table S1.** List of organizations engaged with Beekeepers Cooperative Association-Al Baha in the partnerships from 2016 to 2021.

| Code of Partnership | Organization                                                                                                                         | Type        | Purpose of the Partnership                                                                                                                                     | Website/Social Media Account                                                                                                                  |
|---------------------|--------------------------------------------------------------------------------------------------------------------------------------|-------------|----------------------------------------------------------------------------------------------------------------------------------------------------------------|-----------------------------------------------------------------------------------------------------------------------------------------------|
| P1                  | Albaha Municipality<br>                             | Public      | - Logistic services.<br>- Event staffing.                                                                                                                      | <a href="https://amanatalbaha.gov.sa/">https://amanatalbaha.gov.sa/</a>                                                                       |
| P2                  | Social Development Bank<br>                         | Public bank | - Providing loans for the members of the cooperative.                                                                                                          | <a href="https://www.sdb.gov.sa/en-us/our-products/personal/social-loans">https://www.sdb.gov.sa/en-us/our-products/personal/social-loans</a> |
| P3                  | Saudi post / SPL<br>                                | Public      | - Marketing the bee products to the local clients.                                                                                                             | <a href="https://splonline.com.sa/en/">https://splonline.com.sa/en/</a>                                                                       |
| P4                  | Cooperative Societies Council<br>                   | Cooperative | - Funding projects.<br>- Providing consultancy services.                                                                                                       | <a href="http://www.cscs.org.sa">http://www.cscs.org.sa</a>                                                                                   |
| P5                  | Eng. Abdullah Bugshan Chair for Bee Research<br>   | University  | - Providing training and capacity building programs for the cooperative's beekeepers.<br>- Research.<br>- Extension services for the cooperative's beekeepers. | <a href="https://beechair.ksu.edu.sa/">https://beechair.ksu.edu.sa/</a>                                                                       |
| P6                  | Technical and Vocational Training Corporation<br> | Public      | - Accreditation of the training programs provided by the cooperative.                                                                                          | <a href="https://tvtc.gov.sa/en/Pages/default.aspx">https://tvtc.gov.sa/en/Pages/default.aspx</a>                                             |

| Code of Partnership | Organization                                                                                                                        | Type        | Purpose of the Partnership                                                                                                                                                                                                                                                                                                                      | Website/Social Media Account                                                                                                  |
|---------------------|-------------------------------------------------------------------------------------------------------------------------------------|-------------|-------------------------------------------------------------------------------------------------------------------------------------------------------------------------------------------------------------------------------------------------------------------------------------------------------------------------------------------------|-------------------------------------------------------------------------------------------------------------------------------|
| P7                  | Baljurashi Municipality<br>                        | Public      | <ul style="list-style-type: none"> <li>- Logistic services.</li> <li>- Event staffing.</li> </ul>                                                                                                                                                                                                                                               | <a href="https://sa.linkedin.com/company/baljurashi-municipality">https://sa.linkedin.com/company/baljurashi-municipality</a> |
| P8                  | Eiffel Lebanon Honey World<br>                     | Private     | <ul style="list-style-type: none"> <li>- Indirect funding by purchasing the products of the company (bee medicines and feed supplements).</li> <li>- Consultancy services for the cooperative's beekeepers.</li> </ul>                                                                                                                          | <a href="http://www.lebanonbeeworld.com/home/about">http://www.lebanonbeeworld.com/home/about</a>                             |
| P9                  | Agricultural Cooperative Society In Baljurashi<br> | Cooperative | <ul style="list-style-type: none"> <li>- Providing training programs to the members of Agricultural Cooperative Society in Baljurashi.</li> <li>- Extension services to the members of Agricultural Cooperative Society in Baljurashi.</li> <li>- Establishing a bee pasture for the Agricultural Cooperative Society in Baljurashi.</li> </ul> | <a href="https://ziraeihb.org.sa/">https://ziraeihb.org.sa/</a>                                                               |
| P10                 | Saudi Arabian Oil Co.<br>                        | Private     | <ul style="list-style-type: none"> <li>- Funding projects.</li> <li>- Capacity and building programs for the cooperative's beekeepers.</li> <li>- Direct fund for the cooperative's beekeepers.</li> <li>- Sponsorship of events.</li> </ul>                                                                                                    | <a href="https://www.aramco.com/">https://www.aramco.com/</a>                                                                 |
| P11                 | Ministry of Tourism<br>                          | Public      | <ul style="list-style-type: none"> <li>- Participating in events organized by the ministry.</li> <li>- Supporting the role of the cooperative as a tourist destination.</li> </ul>                                                                                                                                                              | <a href="https://mt.gov.sa/Pages/default.aspx">https://mt.gov.sa/Pages/default.aspx</a>                                       |

| Code of Partnership | Organization                                                                                                                                          | Type                                      | Purpose of the Partnership                                                                                                         | Website/Social Media Account                                                                    |
|---------------------|-------------------------------------------------------------------------------------------------------------------------------------------------------|-------------------------------------------|------------------------------------------------------------------------------------------------------------------------------------|-------------------------------------------------------------------------------------------------|
| P12                 | The General Directorate of Prisons<br>                               | Public                                    | - Providing training and capacity building programs for inmates.                                                                   | <a href="https://www.my.gov.sa/">https://www.my.gov.sa/</a>                                     |
| P13                 | Al Najeh for Honey Bees & Bees Equipment                                                                                                              | Private                                   | - Supplying the cooperative with beekeeping supplies and equipment (indirect funding).                                             | <a href="https://www.alnajeh.ae">https://www.alnajeh.ae</a>                                     |
| P14                 | Diyar Alezz to Organize Events and Conferences<br>                   | Private                                   | - Organizing Events and Conferences                                                                                                | <a href="https://twitter.com/diyaralez1?lang=ar">https://twitter.com/diyaralez1?lang=ar</a>     |
| P15                 | Three quarters to Organize Events and Conferences                                                                                                     | Private                                   | - Organizing Events and Conferences                                                                                                |                                                                                                 |
| P16                 | Ministry of Human Resource and Social Development (MHRSD)<br>       | Public                                    | - Funding projects.<br>- Youth entrepreneurship programs in the field of beekeeping.<br>- Training and capacity building programs. | <a href="https://hrsd.gov.sa/en">https://hrsd.gov.sa/en</a>                                     |
| P17                 | Food and Agricultural Organization of the United Nations (FAO)<br> | International United Nations Organization | - Funding projects.<br>- Consultancy services.<br>- Capacity building and training programs.                                       | <a href="https://www.fao.org/home/en">https://www.fao.org/home/en</a>                           |
| P18                 | Agriculture Development Fund (ADF)<br>                             | Public bank                               | - Loans for the cooperative's beekeepers.<br>- Funding projects.                                                                   | <a href="https://adf.gov.sa/ar/Pages/default.aspx">https://adf.gov.sa/ar/Pages/default.aspx</a> |

| Code of Partnership | Organization                                                                                                                                                                                                                                                                 | Type           | Purpose of the Partnership                                                                                                                                                                                                                                                                                                                                                                                                                                                                                                                                                                                                                             | Website/Social Media Account                                                                                            |
|---------------------|------------------------------------------------------------------------------------------------------------------------------------------------------------------------------------------------------------------------------------------------------------------------------|----------------|--------------------------------------------------------------------------------------------------------------------------------------------------------------------------------------------------------------------------------------------------------------------------------------------------------------------------------------------------------------------------------------------------------------------------------------------------------------------------------------------------------------------------------------------------------------------------------------------------------------------------------------------------------|-------------------------------------------------------------------------------------------------------------------------|
| P19                 | Ministry of Environment, Water, and Agriculture (MEWA)<br>وزارة البيئة والمياه والزراعة<br>Ministry of Environment Water & Agriculture<br>Kingdom of Saudi Arabia المملكة العربية السعودية  | Public         | -Funding projects.                                                                                                                                                                                                                                                                                                                                                                                                                                                                                                                                                                                                                                     | <a href="https://www.mewa.gov.sa/en/Page/default.aspx">https://www.mewa.gov.sa/en/Page/default.aspx</a>                 |
| P20                 | Abu Dhabi Food Control Authority<br>                                                                                                                                                        | Public         | <ul style="list-style-type: none"> <li>- Research, innovation and development of the honey bee sector</li> <li>- Capacity building and training in the fields of beekeeping and beekeeping management.</li> <li>- Cooperation in the field of disease diagnosis, laboratories, and treatment.</li> <li>- Development of bee pastures and the exchange of seeds of pasture plants for bees.</li> <li>- Queen bee development.</li> <li>- Implementing appropriate training and extension programs for beekeepers.</li> <li>- Implementing seasonal visits for beekeepers in the two countries.</li> <li>- Organizing events and conferences.</li> </ul> | <a href="https://www.adafsa.gov.ae/English/Pages/default.aspx">https://www.adafsa.gov.ae/English/Pages/default.aspx</a> |
| P21                 | Almajdouie Foundation<br>                                                                                                                                                                 | Not-for-profit | <ul style="list-style-type: none"> <li>- Funding projects.</li> <li>- Sponsorship of events.</li> <li>- Providing consultancy services.</li> </ul>                                                                                                                                                                                                                                                                                                                                                                                                                                                                                                     | <a href="https://www.almajdouie.org/">https://www.almajdouie.org/</a>                                                   |
| P22                 | Al-Baha University<br>                                                                                                                                                                    | University     | <ul style="list-style-type: none"> <li>- Research.</li> <li>- Organizing events and conferences.</li> </ul>                                                                                                                                                                                                                                                                                                                                                                                                                                                                                                                                            | <a href="https://bu.edu.sa/home">https://bu.edu.sa/home</a>                                                             |

| Code of Partnership | Organization                                                                                                                                 | Type           | Purpose of the Partnership                                                                     | Website/Social Media Account                                                                  |
|---------------------|----------------------------------------------------------------------------------------------------------------------------------------------|----------------|------------------------------------------------------------------------------------------------|-----------------------------------------------------------------------------------------------|
| P23                 | Express Transportation Company Ltd.<br>                     | Private        | - Marketing bee products to the clients.                                                       | <a href="https://www.smsaexpress.com/sa/">https://www.smsaexpress.com/sa/</a>                 |
| P24                 | Lulu International Group<br>                                | Private        | - Marketing bee products in local hypermarkets of the company.                                 | <a href="https://www.lulugroupinternational.com/">https://www.lulugroupinternational.com/</a> |
| P25                 | AL SABLA Digital Solutions<br>                              | Private        | - e-marketing platform.                                                                        | <a href="http://alsablasolutions.com/">http://alsablasolutions.com/</a>                       |
| P26                 | Asra for local agricultural products<br>                    | Private        | - e-marketing platform.                                                                        | <a href="https://asra.sa/">https://asra.sa/</a>                                               |
| P27                 | Arab Organization for Agricultural Development (AOAD)<br> | Not-for-profit | - Organizing and providing training and capacity building programs.<br>- Consultancy services. | <a href="http://www.aoad.org/indexeng.htm">http://www.aoad.org/indexeng.htm</a>               |
| P28                 | River Wood Inc.<br>                                       | Private        | - Design and manufacturing of Beekeepers' clothing.                                            | <a href="https://riverwood.com.pk/">https://riverwood.com.pk/</a>                             |

| Code of Partnership | Organization                                                                                                                                  | Type    | Purpose of the Partnership                                                                                                                                                                                                                                                                                  | Website/Social Media Account                                                                    |
|---------------------|-----------------------------------------------------------------------------------------------------------------------------------------------|---------|-------------------------------------------------------------------------------------------------------------------------------------------------------------------------------------------------------------------------------------------------------------------------------------------------------------|-------------------------------------------------------------------------------------------------|
| P29                 | Hive Alive<br>                                               | Private | - Providing feed supplements for honeybees to the cooperative (indirect funding).                                                                                                                                                                                                                           | <a href="https://hivealivebees.com/">https://hivealivebees.com/</a>                             |
| P30                 | Al-Aseel Foundation for Honey and Bee Supplies<br>           | Private | - Providing beekeeping supplies and equipment to the cooperative (indirect funding).                                                                                                                                                                                                                        | <a href="https://asilbee.com/">https://asilbee.com/</a>                                         |
| P31                 | Wesam Albadyah for Organizing Celebrations and Festivals<br> | Private | - Organizing events and conferences.                                                                                                                                                                                                                                                                        | <a href="https://twitter.com/wesamalbadya?lang=ar">https://twitter.com/wesamalbadya?lang=ar</a> |
| P32                 | ANHB Group<br>                                              | Private | - Development of local queen bees.<br>- Marketing the products of each partner.<br>- Development of post-harvest practices of the cooperative's products.<br>- Providing training and capacity building programs for the beekeepers.<br>- Subsidizing the prices of beekeeping supplies for the beekeepers. | <a href="https://anhb.ae/">https://anhb.ae/</a>                                                 |
| P33                 | Lyson Beekeeping<br>                                       | Private | - Providing beekeeping supplies and equipment to the cooperative (indirect funding).<br>- Consulting services.                                                                                                                                                                                              | <a href="https://www.lysonau.com.au/">https://www.lysonau.com.au/</a>                           |
